# Supplementary material
Source: publisher figshare collection journal article supplement (https://rs.figshare.com/ndownloader/files/22179249)
Supplement: Supplementary file 1 [file 22179249]

## Sheet: Table S1
Table S1. Description of the 24 studies reporting a link between personality and social information use (whether positive “+”, negative “-“, or non-significant “NS”), sorted by order and species. “Pop.” refers to the conditions in which the population was studied (“c” for captivity, “w” for wild, “wc” for wild population brought back in captivity for the study). N is the sample size. We also desc…
Order & Species		Pop.	N	Context	Social information	Mechanism		Perso. trait	Link	Details		Reference
Aves
	Branta leucopsis	c	28	F	Feeding site of conspecifics	Attraction		Neophobia	+	Neophobic individuals join conspecifics at feeding site		Kurvers et al., 2010a
	Branta leucopsis	c	12	F	Sites with higher conspecific feeding rate	Public information		Neophobia	+	Neophobic individuals join conspecifics feeding at higher rate		Kurvers et al., 2010b
	Branta leucopsis	c	28	S	Following tutors through a maze towards aviary	Copying		Neophobia	+	Neophobic individuals followed demonstrator in a maze, rather than lead (only when 1 demonstrator, no personality effect when 3)		Kurvers et al. 2011
	Corvus frugilegus	wc	19	F	Scrounging for feeding site	Public information		Neophobia	-	Less neophobic individuals did not produce more (foraging context), but scrounged more than neophobic ones.		Jolles et al. 2013
	Parus major	c	14	F	Copying tutors feeding site	Imitation		Exploration	+	Explorers copy tutors feeding site		Marchetti & Drent, 2000
	Parus major	w	152	F	Discovering new food patch while foraging in flocks			Sociability		Individuals with a higher centrality had more chance to discover new food patch, likely due to a greater access to social information		Aplin et al. 2012
	Parus major	w	134	F	Flocking behaviour during foraging	Attraction		Exploration	-	Slow explorers were more socially attracted and choose foraging sites with high conspecific density		Aplin et al. 2014
	Parus major	c	36	S	Conspecific attraction (mimicking social defeat or mate choice decisions)	Attraction		Neophobia	+	Neophobic individuals were more attracted to conspecifics		Snijders et al., 2017
								Exploration	NS	No effect of exploration on social attraction
	Parus major	c	47	F	Copying tutor's feeding site preference (colour association)			Exploration	-	Slow explorers were more likely to use both personal and social information, while fast explorers chose at random.		Smit & van Oers 2019
	Poecile atricapillus	w	63	F	Discovering new food patch while foraging in flocks			Sociability		Dominant individuals with lower centrality had more change to follow than initiate a foraging event		Evans et al. 2018
								Exploration	NS
	Taeniopygia guttata	c	24	F	Scrounging for feeding site	Scrounger		Exploration	NS	No effect of exploration on scrounging success		David et al., 2011
Mammalia
	Ovis aries	d	40	S	Group dynamic	Group dynamic		Neophobia	+	Goups of neophobic individuals tended to be more cohesive (split less)		Michelena et al. 2009
	Ovis aries	d	20	F	Flocking behaviour, with or without human disturbance	Social cues		Exploration	-	Slow explorers aggregated more to conspecifics, especially when disturbed		Sibbald et al. 2009
	Papio ursinus	wc	55	F	Scrounging for feeding site	Scrounger		Neophobia	+	In natural conditions, no effect of personality of joining conspecifics. In manipulated conditions, when patch quality could not be seen from far, neophobic individuals tend to join conspecifics. No effect of boldness.		Carter et al. 2013
								Boldness	NS
	Papio ursinus	wc	32-36	F	Social learning (novel food)	Imitation		Neophobia	-	Less neophobic and shy individuals handled the novel food longer after observing a demonstrator		Carter et al. 2014
								Boldness	+	Bold (less "anxious") individuals payed more attention to demonstrators
	Papio ursinus	wc	33-41	F	Social learning (solving task for food)	Imitation		Neophobia	NS	No effect of personality on the propensity to observe demonstrator, or to handle longer the task after observing demonstrator		Carter et al. 2014
								Boldness	NS
	Papio ursinus	wc	94	F	Scrounging for feeding site	Scrounger		Neophobia	NS	No effect of personality on the observation of others or on entering feeding patch newly discovered by others		Carter et al. 2016
Pisces
	Gasterosteus aculeatus	wc	60	S	Schoaling tendency	Social cue		Boldness	-	Shy individuals tended to schoal more		Ward et al. 2004
	Gasterosteus aculeatus	wc	30	F	Sites with higher conspecific feeding rate	Public information		Exploration	NS	No effect of exploration on public information use		Webster et al. 2007
	Gasterosteus aculeatus	wc		F	Following demonstrators in maze to feeding site	Social cue		Exploration	+	Explorers follow conspecifics		Nomakuchi et al., 2009
	Gasterosteus aculeatus	wc	43	F	Joining 2 vs. 6 conspecifics.	Social cues		Boldness	NS	No effect of boldness, but shy individuals took more time to decide.		Harcourt et al. 2010
					Joining conspecifics feeding vs. not feeding	Local enhancement		Boldness	NS
					Joining conspecifics feeding at a high vs. low rate	Public information		Boldness	NS
	Poecilia reticulata	wc	136	F	Scrounging for feeding site	Scrounger		Boldness	-	In mixed group, female shy individuals follow bold ones		Dyer et al. 2008
	Poecilia reticulata	wc	49	F	Use public over personal information	Public information		Neophobia	+	Neophobic individuals tend to scrounge. Less neophobic individuals tended to avoid conspecifics, maybe to avoid depleted patch		Trompf & Brown, 2014
								Sociability	+	Social individuals are attracted by conspecifics, and favor social over personal information
	Pungitius pungitius	wc	60	F	Public information	Public information		Exploration	NS	Personality traits did not affect the probability to use public information about patch quality		Webster et al. 2015
								Sociability	NS
	Symphodus tinca	w	25	S	Schoaling tendency	Social cue		Activity	+	Active S. tinca schoal more		Budaev et al. 1998
	Symphodus ocellatus	w	23	S	Schoaling tendency	Social cue		Activity	NS	No correlation in S. ocellatus		Budaev et al. 1998

## Sheet: References
Aplin, L. M., D. R. Farine, R. P. Mann, and B. C. Sheldon. 2014. Individual-level personality influences social foraging and collective behaviour in wild birds. Proceedings of the Royal Society B: Biological Sciences 281:20141016–20141016.
Aplin, L. M., D. R. Farine, J. Morand-Ferron, and B. C. Sheldon. 2012. Social networks predict patch discovery in a wild population of songbirds. Proceedings of the Royal Society B: Biological Sciences 279:4199–4205.
Budaev, S. V., and D. D. Zworykin. 1998. Difference in shoaling behaviour between ocellated (Symphodus ocellatus) and long-striped (S. tinca) wrasses and its relation with other behavioural patterns. Marine and Freshwater Behaviour and Physiology 31:115–121.
Carter, A. J., H. H. Marshall, R. Heinsohn, and G. Cowlishaw. 2013. Personality predicts decision making only when information is unreliable. Animal Behaviour 86:633–639.
Carter, A. J., H. H. Marshall, R. Heinsohn, and G. Cowlishaw. 2014. Personality predicts the propensity for social learning in a wild primate. PeerJ 2:e283.
Carter, A. J., M. T. Ticó, and G. Cowlishaw. 2016. Sequential phenotypic constraints on social information use in wild baboons. eLife 5:1–21.
David, M., F. Cézilly, and L. A. Giraldeau. 2011. Personality affects zebra finch feeding success in a producer-scrounger game. Animal Behaviour 82:61–67.
Dyer, J. R. G., D. P. Croft, L. J. Morrell, and J. Krause. 2008. Shoal composition determines foraging success in the guppy. Behavioral Ecology 20:165–171.
Evans, J. C., T. B. Jones, and J. Morrand-Ferron. 2017. Dominance and the initiation of group feeding events: the modifying effect of sociality. Behavioural Ecology 29:448-458.
Harcourt, J. L., S. Biau, R. Johnstone, and A. Manica. 2010. Boldness and information use in three-spined sticklebacks. Ethology 116:440–447.
Jolles, J. W., L. Ostojić, and N. S. Clayton. 2013. Dominance, pair bonds and boldness determine social-foraging tactics in rooks, Corvus frugilegus. Animal Behaviour 85:1261–1269.
Kurvers, R. H. J. M., V. M. A. P. Adamczyk, S. E. van Wieren, and H. H. T. Prins. 2011. The effect of boldness on decision-making in barnacle geese is group-size-dependent. Proceedings of the Royal Society B: Biological Sciences 278:2018–2024.
Kurvers, R. H. J. M., K. van Oers, B. A. Nolet, R. M. Jonker, S. E. van Wieren, H. H. T. Prins, and R. C. Ydenberg. 2010a. Personality predicts the use of social information. Ecology Letters 13:829–837.
Kurvers, R. H. J. M., H. H. T. Prins, S. E. van Wieren, K. van Oers, B. A. Nolet, and R. C. Ydenberg. 2010b. The effect of personality on social foraging: shy barnacle geese scrounge more. Proceedings of the Royal Society B: Biological Sciences 277:601–608.
Marchetti, C., and P. Drent. 2000. Individual differences in the use of social information in foraging by captive great tits. Animal behaviour 60:131–140.
Michelena, P., A. M. Sibbald, H. W. Erhard, and J. E. McLeod. 2009. Effects of group size and personality on social foraging: the distribution of sheep across patches. Behavioral Ecology 20:145–152.
Nomakuchi, S., P. J. Park, and M. A. Bell. 2009. Correlation between exploration activity and use of social information in three-spined sticklebacks. Behavioral Ecology 20:340–345.
Sibbald, A. M., H. W. Erhard, J. E. McLeod, and R. J. Hooper. 2009. Individual personality and the spatial distribution of groups of grazing animals: An example with sheep. Behavioural Processes 82:319–326.
Smit, J. A. H., and K. van Oers. 2019. Personality types vary in their personal and social information use. Animal Behaviour XXX:1-9
Snijders, L., M. Naguib, and K. van Oers. 2017. Dominance rank and boldness predict social attraction in great tits. Behavioral Ecology 28:398–406.
Trompf, L., and C. Brown. 2014. Personality affects learning and trade-offs between private and social information in guppies, Poecilia reticulata. Animal Behaviour 88:99–106.
Ward, A. J. W., P. Thomas, P. J. B. Hart, and J. Krause. 2004. Correlates of boldness in three-spined sticklebacks (Gasterosteus aculeatus). Behavioral Ecology and Sociobiology 55:561–568.
Webster, M. M., and K. N. Laland. 2015. Space-use and sociability are not related to public-information use in ninespine sticklebacks. Behavioral Ecology and Sociobiology.
Webster, M. M. M., A. J. W. Ward, P. J. B. Hart, A. J. W. Hart, and P. J. B. Ward. 2007. Boldness is influenced by social context in Threespine sticklebacks (Gasterosteus aculeatus). Behaviour 144:351–371.
